# Supplementary material for: A Single Nucleotide Polymorphism in KCNQ1 Is Associated With Susceptibility to Diabetic Nephropathy in Japanese Subjects With Type 2 Diabetes
Source: PubMed Central journal article supplement — Diabetes Care. 2010 Jan 7;33(4):842–6. doi: 10.2337/dc09-1933 (PMC2845039; doi:10.2337/dc09-1933), 2010-01-07

Supplementary Table A1 Clinical characteristics of the subjects

|                                         | Initial study          |                        | Replication 1 |               | Replication 2 |                       | Replication 3 |            |
|-----------------------------------------|------------------------|------------------------|---------------|---------------|---------------|-----------------------|---------------|------------|
|                                         | Case                   | Control                | Case          | Control       | Case          | Control               | Case          | Control    |
| Sex (M:F)                               | 505 : 244 <sup>†</sup> | 267 : 285 <sup>‡</sup> | 302 : 147     | 555 : 410     | 206 : 104     | 148 : 69 <sup>§</sup> | 20 : 12       | 110 : 58   |
| Age (year)*                             | 60.1 ± 0.4             | 62.4 ± 0.5             | 64.7 ± 0.4    | 64.8 ± 0.3    | 64.5 ± 0.6    | 65.0 ± 0.7            | 60.9 ± 1.7    | 60.4 ± 0.7 |
| BMI (kg <sup>2</sup> /m <sup>2</sup> )* | 23.7 ± 0.2             | 23.6 ± 0.2             | 23.5 ± 0.2    | 23.8 ± 0.1    | 22.3 ± 0.2    | 23.4 ± 0.3            | 24.9 ± 0.5    | 23.9 ± 0.3 |
| HbA1c (%)*                              | 7.6 ± 0.2              | 7.6 ± 0.1              | 8.0 ± 0.1     | 8.1 ± 0.1     | 6.1 ± 0.1     | 6.8 ± 0.1             | 7.7 ± 0.2     | 7.4 ± 0.1  |
| SBP (mmHg)*                             | 140 ± 1                | 132 ± 1                | 141 ± 1       | 134 ± 1       | 143 ± 1       | 121 ± 1               | 138 ± 3       | 137 ± 1    |
| DBP (mmHg)*                             | 76 ± 0.5               | 74 ± 0.5               | 77 ± 0.5      | 77 ± 0.4      | 73 ± 1        | 69 ± 1                | 77 ± 2        | 77 ± 1     |
| Duration (year)*                        | 19.3 ± 0.4             | 15.3 ± 0.4             | Not available | Not available | 21.7 ± 0.9    | 16 ± 0.4              | 14.5 ± 1.6    | 12.8 ± 0.7 |

\*Data are mean ± SE. <sup>†</sup>5 unknown. <sup>‡</sup>6 unknown. <sup>§</sup>7 unknown.

Supplementary Table A2 Association of SNPs in *KCNQ1* with diabetic nephropathy in the initial study

| SNP        | allele | Case   |             |                  | Control |             |                  |
|------------|--------|--------|-------------|------------------|---------|-------------|------------------|
|            |        | MAF    | 11/12/22    | P <sub>HWE</sub> | MAF     | 11/12/22    | P <sub>HWE</sub> |
| rs1057128  | G > A  | 0.293  | 318/269/53  | 0.712            | 0.289   | 212/166/37  | 0.583            |
| rs234886   | C > G  | 0.195  | 475/224/30  | 0.581            | 0.191   | 330/164/15  | 0.317            |
| rs234872   | T > C  | 0.338  | 277/287/71  | 0.796            | 0.328   | 190/183/46  | 0.846            |
| rs2237886  | C > T  | 0.190  | 482/226/27  | 0.936            | 0.178   | 338/159/11  | 0.121            |
| rs234878   | A > G  | 0.268  | 339/255/43  | 0.594            | 0.284   | 211/171/32  | 0.744            |
| rs2074200  | C > G  | 0.209  | 455/228/36  | 0.288            | 0.224   | 306/167/29  | 0.331            |
| rs234881   | C > T  | 0.2088 | 469/225/41  | 0.046            | 0.2090  | 324/162/26  | 0.331            |
| rs163171   | C > T  | 0.401  | 258/335/117 | 0.639            | 0.388   | 190/243/76  | 0.906            |
| rs163170   | A > G  | 0.420  | 248/354/131 | 0.811            | 0.406   | 179/253/82  | 0.637            |
| rs151290   | C > A  | 0.405  | 261/334/124 | 0.335            | 0.389   | 186/250/73  | 0.453            |
| rs2074196  | G > T  | 0.389  | 275/324/116 | 0.213            | 0.374   | 193/245/66  | 0.392            |
| rs2074197  | C > T  | 0.391  | 277/339/117 | 0.436            | 0.373   | 196/246/67  | 0.457            |
| rs11602964 | C > T  | 0.393  | 238/299/101 | 0.661            | 0.379   | 157/205/56  | 0.394            |
| rs2237888  | C > T  | 0.357  | 308/323/99  | 0.330            | 0.362   | 209/233/68  | 0.810            |
| rs123381   | G > A  | 0.160  | 523/185/25  | 0.091            | 0.194   | 336/152/23  | 0.279            |
| rs234844   | G > C  | 0.220  | 451/234/43  | 0.090            | 0.239   | 294/184/29  | 0.976            |
| rs163177   | T > C  | 0.457  | 218/339/156 | 0.264            | 0.438   | 164/233/102 | 0.250            |
| rs2237892  | C > T  | 0.345  | 310/335/84  | 0.650            | 0.312   | 246/211/54  | 0.385            |
| rs163183   | C > T  | 0.036  | 346/25/1    | 0.450            | 0.071   | 288/39/4    | 0.052            |
| rs163184   | T > G  | 0.470  | 201/369/157 | 0.611            | 0.466   | 147/252/112 | 0.838            |
| rs2283228  | A > C  | 0.372  | 288/331/103 | 0.616            | 0.333   | 236/203/67  | 0.029            |
| rs234857   | T > C  | 0.176  | 438/179/23  | 0.379            | 0.194   | 270/129/16  | 0.904            |
| rs2237895  | A > C  | 0.410  | 254/353/123 | 0.985            | 0.409   | 183/236/91  | 0.327            |
| rs2299620  | C > T  | 0.374  | 292/355/103 | 0.766            | 0.330   | 257/227/69  | 0.092            |
| rs2237896  | G > A  | 0.351  | 311/346/89  | 0.628            | 0.307   | 270/225/57  | 0.322            |
| rs2237897  | C > T  | 0.333  | 331/336/81  | 0.756            | 0.277   | 294/210/48  | 0.235            |
| rs458069   | G > C  | 0.278  | 336/254/51  | 0.757            | 0.294   | 207/173/36  | 0.986            |
| rs2283229  | G > A  | 0.466  | 198/384/149 | 0.135            | 0.471   | 140/260/110 | 0.601            |
| rs433052   | C > T  | 0.2391 | 425/267/42  | 0.994            | 0.2392  | 302/175/35  | 0.167            |
| rs2237898  | A > C  | 0.313  | 341/320/68  | 0.569            | 0.302   | 250/212/48  | 0.753            |
| rs2237899  | C > T  | 0.417  | 237/379/116 | 0.081            | 0.403   | 189/233/90  | 0.218            |
| rs2237900  | G > A  | 0.322  | 328/321/71  | 0.558            | 0.331   | 219/232/50  | 0.313            |
| rs10798    | G > A  | 0.144  | 471/160/13  | 0.891            | 0.165   | 296/109/15  | 0.216            |

MAF, minor allele frequency; 11, homozygous of major allele; 12, heterozygous; 22, homozygous of minor allele; OR, odds ratio; CI, confidence interval; HWE, Hardy-Weinberg equilibrium.

Supplementary Table A3 Association of SNPs in *KCNQ1* with diabetic nephropathy in the initial study

| SNP        | Risk allele | unadjusted |                  | adjusted* |                  |
|------------|-------------|------------|------------------|-----------|------------------|
|            |             | P          | OR (95% CI)      | P         | OR(95%CI)        |
| rs1057128  | A           | 0.851      |                  | 0.955     |                  |
| rs234886   | G           | 0.793      |                  | 0.627     |                  |
| rs234872   | C           | 0.646      |                  | 0.934     |                  |
| rs2237886  | T           | 0.431      |                  | 0.864     |                  |
| rs234878   | A           | 0.413      |                  | 0.657     |                  |
| rs2074200  | A           | 0.370      |                  | 0.820     |                  |
| rs234881   | C           | 0.993      |                  | 0.878     |                  |
| rs163171   | T           | 0.529      |                  | 0.635     |                  |
| rs163170   | G           | 0.467      |                  | 0.710     |                  |
| rs151290   | A           | 0.435      |                  | 0.561     |                  |
| rs2074196  | T           | 0.462      |                  | 0.556     |                  |
| rs2074197  | T           | 0.377      |                  | 0.426     |                  |
| rs11602964 | T           | 0.534      |                  | 0.616     |                  |
| rs2237888  | C           | 0.804      |                  | 0.951     |                  |
| rs123381   | G           | 0.036      | 1.24 (1.02–1.52) | 0.012     | 1.39 (1.08–1.79) |
| rs234844   | G           | 0.280      |                  | 0.247     |                  |
| rs163177   | C           | 0.375      |                  | 0.296     |                  |
| rs2237892  | T           | 0.104      |                  | 0.870     |                  |
| rs163183   | C           | 0.014      | 1.78 (1.13–2.81) | 0.328     | 1.32 (0.76–2.11) |
| rs163184   | G           | 0.844      |                  | 0.643     |                  |
| rs2283228  | C           | 0.054      |                  | 0.038     |                  |
| rs234857   | T           | 0.297      |                  | 0.126     |                  |
| rs2237895  | C           | 0.982      |                  | 0.86      |                  |
| rs2299620  | T           | 0.022      | 1.21 (1.03–1.42) | 0.074     | 1.20 (0.98–1.46) |
| rs2237896  | A           | 0.019      | 1.22 (1.03–1.44) | 0.082     | 1.20 (0.98–1.47) |
| rs2237897  | T           | 0.0027     | 1.30 (1.09–1.54) | 0.008     | 1.33 (1.08–1.63) |
| rs458069   | G           | 0.405      |                  | 0.226     |                  |
| rs2283229  | G           | 0.837      |                  | 0.899     |                  |
| rs433052   | C           | 0.993      |                  | 0.882     |                  |
| rs2237898  | C           | 0.566      |                  | 0.793     |                  |
| rs2237899  | T           | 0.481      |                  | 0.780     |                  |
| rs2237900  | G           | 0.605      |                  | 0.858     |                  |
| rs10798    | G           | 0.192      |                  | 0.275     |                  |

\*adjusted for age, sex, BMI, and duration of type 2 diabetes. OR, odds ratio; CI, confidence interval.

Supplementary Table A4 Association of haplotypes in *KCNQ1* with diabetic nephropathy

| Haplotype                     | Case frequency | Control frequency | P value |
|-------------------------------|----------------|-------------------|---------|
| Within block                  |                |                   |         |
| rs2237892/rs163184 (Block 4)  |                |                   |         |
| C/G                           | 0.467          | 0.466             | 0.967   |
| T/T                           | 0.342          | 0.309             | 0.081   |
| C/T                           | 0.189          | 0.224             | 0.035   |
| T/G                           | 0.002          | 0.001             | 0.781   |
| rs2283228/rs234857 (Block 5)  |                |                   |         |
| A/T                           | 0.457          | 0.477             | 0.317   |
| C/T                           | 0.369          | 0.330             | 0.047   |
| A/C                           | 0.172          | 0.189             | 0.275   |
| C/C                           | 0.003          | 0.003             | 0.560   |
| rs2299620/rs2237896 (Block 6) |                |                   |         |
| C/G                           | 0.619          | 0.669             | 0.010   |
| T/A                           | 0.351          | 0.296             | 0.0041  |
| T/G                           | 0.026          | 0.029             | 0.719   |
| C/A                           | 0.004          | 0.006             | 0.375   |
| Beyond Blocks                 |                |                   |         |
| rs2237892/rs2237895/rs2237897 |                |                   |         |
| C/C/C                         | 0.405          | 0.404             | 0.972   |
| T/A/T                         | 0.296          | 0.246             | 0.0058  |
| C/A/C                         | 0.213          | 0.260             | 0.0055  |
| T/A/C                         | 0.041          | 0.060             | 0.026   |
| C/A/T                         | 0.038          | 0.024             | 0.047   |
| T/C/C                         | 0.005          | 0.004             | 0.589   |
| C/C/T                         | 0.002          | 0.001             | 0.725   |

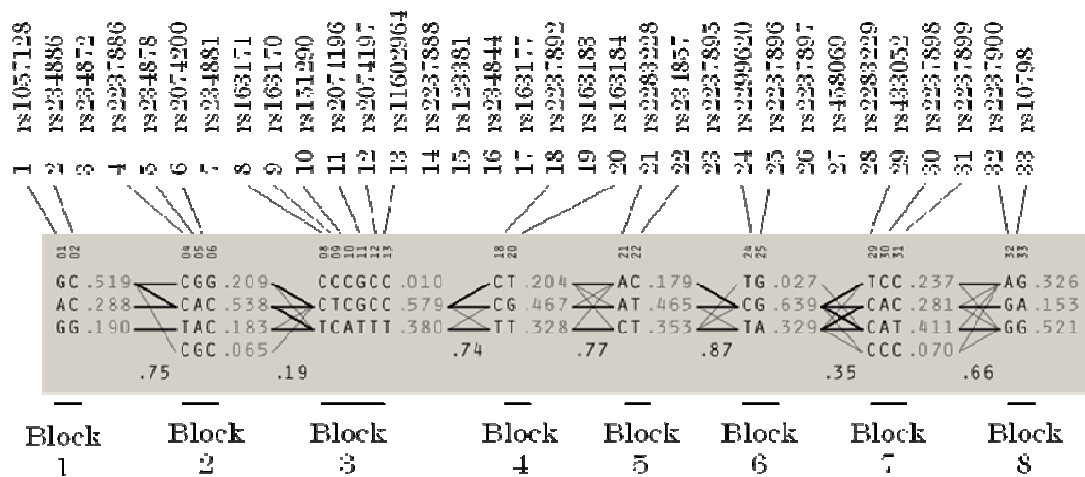

Supplement: supp_dc09-1933_dc09-1933_online_appendix.pdf [file supp_dc09-1933_dc09-1933_online_appendix.pdf]
